# Supplementary material for: Gender-Dependent Reference Range of Serum Calcitonin Levels in Healthy Korean Adults
Source: PubMed Central journal article supplement — Endocrinol Metab (Seoul). 2021 Apr 7;36(2):365–73. doi: 10.3803/EnM.2020.939 (PMC8090475; doi:10.3803/enm.2020.939), 2021-04-07
Supplement: enm-2020-939-suppl.pdf [file enm-2020-939-suppl.pdf]

**Supplemental Table S1.** Baseline Characteristics of Study Subjects

| Characteristic                     | Group 1 (n=10,566) | Group 2 (n=5,152) | Group 3 (n=4,638) |
|------------------------------------|--------------------|-------------------|-------------------|
| Age, yr                            | 55.0 (49.0–60.0)   | 54.0 (48.0–59.0)  | 53.0 (47.0–59.0)  |
| Male sex                           | 6,341 (60.0)       | 3,096 (60.1)      | 2,782 (60.0)      |
| Body mass index, kg/m <sup>2</sup> | 23.5 (21.6–25.5)   | 23.5 (21.5–25.5)  | 23.5 (21.6–25.5)  |
| Smoking                            |                    |                   |                   |
| Never                              | 5,225 (49.5)       | 2,584 (50.2)      | 2,336 (50.3)      |
| Ex-smoker                          | 2,962 (28.0)       | 1,444 (28.0)      | 1,268 (27.4)      |
| Current smoker                     | 2,379 (22.5)       | 1,124 (21.8)      | 1,034 (22.3)      |
| Corrected calcium, mg/dL           | 9.3 (9.0–9.5)      | 9.2 (9.0–9.5)     | 9.2 (9.0–9.5)     |
| Thyroid dysfunction                | 490 (4.6)          | -                 | -                 |
| T4 replacement                     | 172 (1.6)          | -                 | -                 |
| Calcitonin, pg/mL                  | 2.3±1.9            | 2.3±1.7           | 2.3±1.7           |

Values are expressed as median (interquartile range), number (%), or mean±standard deviation.  
T4, thyroxine.
